# Supplementary figures and images for: Identification of new subtypes of breast cancer based on vasculogenic mimicry related genes and a new model for predicting the prognosis of breast cancer
Source: PubMed Central journal article supplement — Heliyon. 2024 Aug 20;10(17):e36565. doi: 10.1016/j.heliyon.2024.e36565 (PMC11387377; doi:10.1016/j.heliyon.2024.e36565), 2024-08-20

Figure S1

A

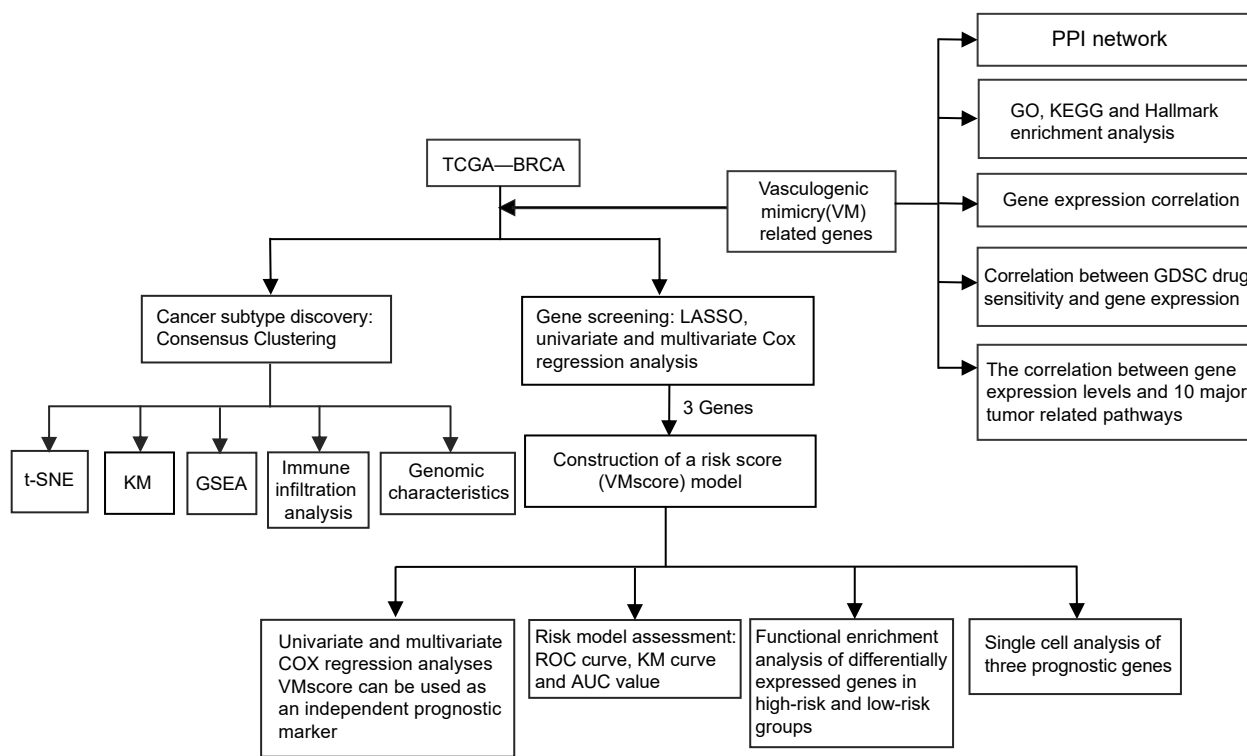

B

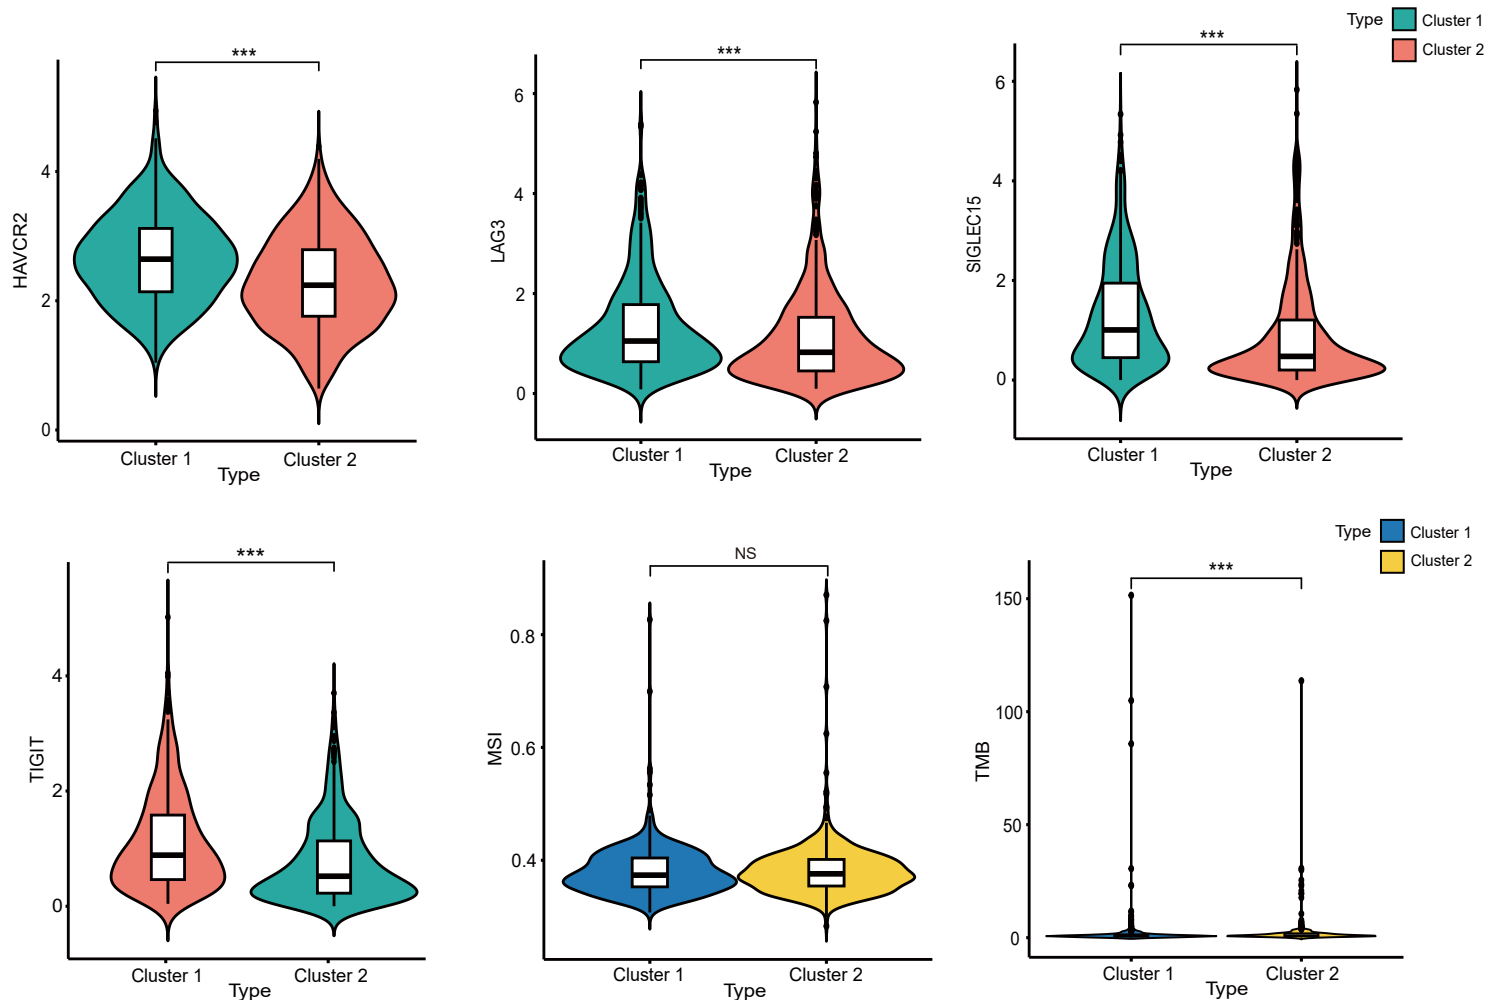

Supplement: mmc3.pdf [file mmc3.pdf]
